# Supplementary material for: Limited Benefit of Marine Protein Hydrolysate on Physical Function and Strength in Older Adults: A Randomized Controlled Trial
Source: PubMed Central journal article supplement (PMC7912527; doi:10.3390/md19020062), 2021-01-27
Supplement: marinedrugs-19-00062-s001.pdf [file marinedrugs-19-00062-s001.pdf]

## Data Sheet

# Marine Peptides

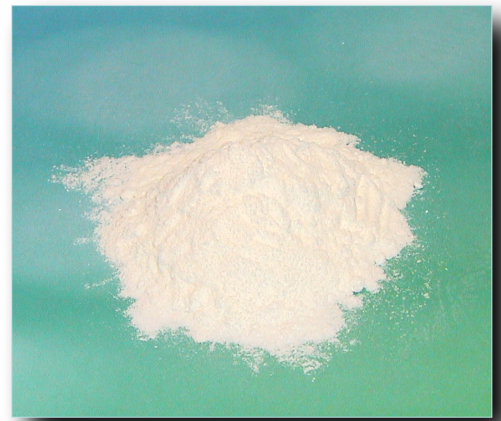

Protein hydrolysate manufactured by hydrolysis of fresh or fresh frozen meat of Atlantic Cod (*Gadus morhua*) using industrial food approved non-GMO proteolytic enzymes. The hydrolysis is performed with equipment and procedures according to regulations given by the Norwegian food authorities. Marine Peptides is approved as food ingredient in Norway according to EU-regulations.

### Energy

|              |      |
|--------------|------|
| Kcal / 100 g | 362  |
| KJ / 100 g   | 1514 |

### Proximal composition [%]

|                  |        |
|------------------|--------|
| Protein (Nx6.25) | > 88.0 |
| Total fat        | < 0.2  |
| Carbohydrates    | 0      |
| Water            | < 3.0  |
| Ash              | 10.0   |

### Minerals [%]

|             |      |
|-------------|------|
| Salt (NaCl) | 0.1  |
| Sodium      | 1.7  |
| Chloride    | 0.07 |

### Heavy metals [mg/kg]

|              |        |
|--------------|--------|
| Lead         | < 0.05 |
| Cadmium [Cd] | 0.03   |
| Mercury [Hg] | 0.11   |
| Arsenic      | 49.0   |

### Microbiology [per gram]

|                                 |       |
|---------------------------------|-------|
| Coliform bacteria (37 °C)       | 0     |
| Thermotolerant colif. (44.5 °C) | 0     |
| Coagulase pos Staphylococcus    | 0     |
| Mould and yeast                 | < 100 |
| Salmonella spp                  | 0     |
| Listeria nonocrogenes           | 0     |

### Solubility, smell and taste

Easily soluble in cold water giving a clear solution. No bitter taste. Weak sweetish smell and very low note of marine fish; easily masked on demand in applications.

### Shelflife

Minimum 3 years in unopened package.

### Amino acid profile (mg/g)

#### **Non-essential amino acids**

|                |       |
|----------------|-------|
| Aspartic acid  | 96.2  |
| Glutamic acid  | 157.8 |
| Hydroxyproline | 4.8   |
| Serine         | 42.4  |
| Glycine        | 48.3  |
| Alanine        | 63.2  |
| Proline        | 30.9  |
| Tyrosine       | 25.4  |
| Arginine       | 56.9  |

#### **Essential amino acids**

|               |      |
|---------------|------|
| Histidine     | 28.4 |
| Threonine     | 37.0 |
| Methionine    | 27.2 |
| Phenylalanine | 27.1 |
| Valine        | 40.5 |
| Isoleucine    | 36.4 |
| Leucine       | 76.2 |
| Lysin         | 92.5 |
| Tryptofan     | 5.5  |

|                                       |              |
|---------------------------------------|--------------|
| Sum amino acids                       | 888.0        |
| Essential amino acids (EAA)           | 367          |
| Non-essential amino acids (NEAA)      | 521          |
| <b>Ratio EAA/NEAA</b>                 | <b>0.70</b>  |
| <b>Branched Chain Amino Acids</b>     | <b>153.1</b> |
| Estimated content of <i>Glutamine</i> | 78.9         |

Molecular weight distribution analysis by exclusion chromatography shows that 15 % of the peptides have molecular weights higher than 5.000 Da (more than 36 amino acids in the peptides), 10 % between 5.000 and 2.500 Da (36 to 18 amino acids in the peptides), 10 % between 2.500 and 1.000 Da (18 to 7 amino acids in the peptides), and 55 % with molecular weight less than 1.000 Da (ie 7 or less amino acids in the peptides).
